# Supplementary material for: The protective effect of biomineralized BSA-Mn3O4 nanoparticles on HUVECs investigated by atomic force microscopy
Source: Royal Society of Chemistry journal article supplement (doi:10.1039/d2an00483f), 2022-01-01
Supplement: d2an00483f1.pdf [file d2an00483f1.pdf]

## Supplementary Material

### The protective effect of biom mineralized BSA-Mn<sub>3</sub>O<sub>4</sub> nanoparticles on HUVECs investigating by atomic force microscopy

Xinyue Guo<sup>a, b, 1</sup>, Weiqi Zhou<sup>a, 1</sup>, Yanxue Guan<sup>a</sup>, Juan Qin<sup>a, b</sup>, Bailin Zhang<sup>a, b</sup>,

Miaomiao Zhang<sup>\*, a</sup>, Jilin Tang<sup>\*, a, b</sup>

<sup>a</sup> State Key Laboratory of Electroanalytical Chemistry, Changchun Institute of Applied Chemistry, Chinese Academy of Sciences, Changchun, 130022, P.R. China

<sup>b</sup> University of Science and Technology of China, Hefei, 230026, P.R. China

**\*Corresponding author:**

E-mail: jltang@ciac.ac.cn; Tel/Fax: +86-431-85262734

**<sup>1</sup>Auther contributions:**

These two authors contributed equally to this work.

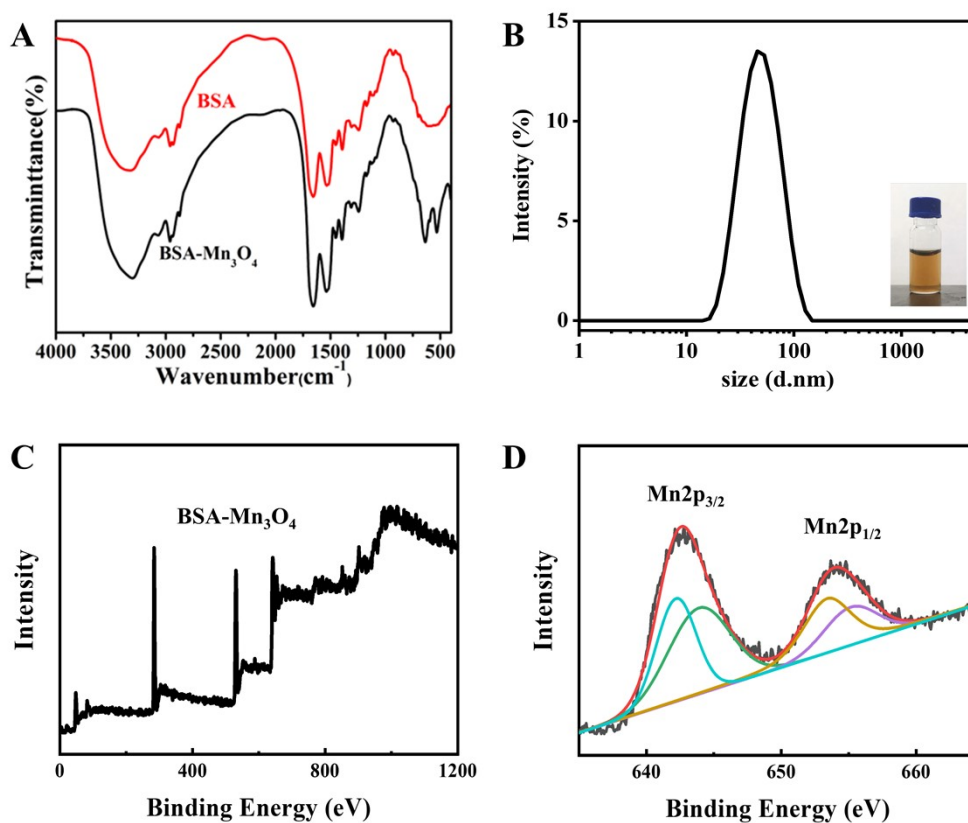

Figure S1 (A) FT-IR spectra of BSA and BSA-Mn<sub>3</sub>O<sub>4</sub> NPs. (B) Hydrodynamic diameter of BSA-Mn<sub>3</sub>O<sub>4</sub> NPs in aqueous solution after one month incubation. Inset: a corresponding photograph of BSA-Mn<sub>3</sub>O<sub>4</sub> NPs in aqueous solution. (C) XPS spectrum of BSA-Mn<sub>3</sub>O<sub>4</sub> NPs. (D) XPS spectrum of Mn 2p region of BSA-Mn<sub>3</sub>O<sub>4</sub> NPs.
